# Supplementary material
Source: MDPI journal article supplement (https://www.mdpi.com/2305-6320/8/10/56)
Supplement: s1 [file s1]

# Supplementary Materials: Lignosulfonate Rapidly Inactivates Human Immunodeficiency and Herpes Simplex Viruses

Kunihiko Fukuchi, Takuro Koshikawa, Daisuke Asai, Megumi Inomata, Hiroshi Sakagami, Hiromu Takemura, Taisei Kanamoto, Hikaru Aimi and Yuji Kikkawa

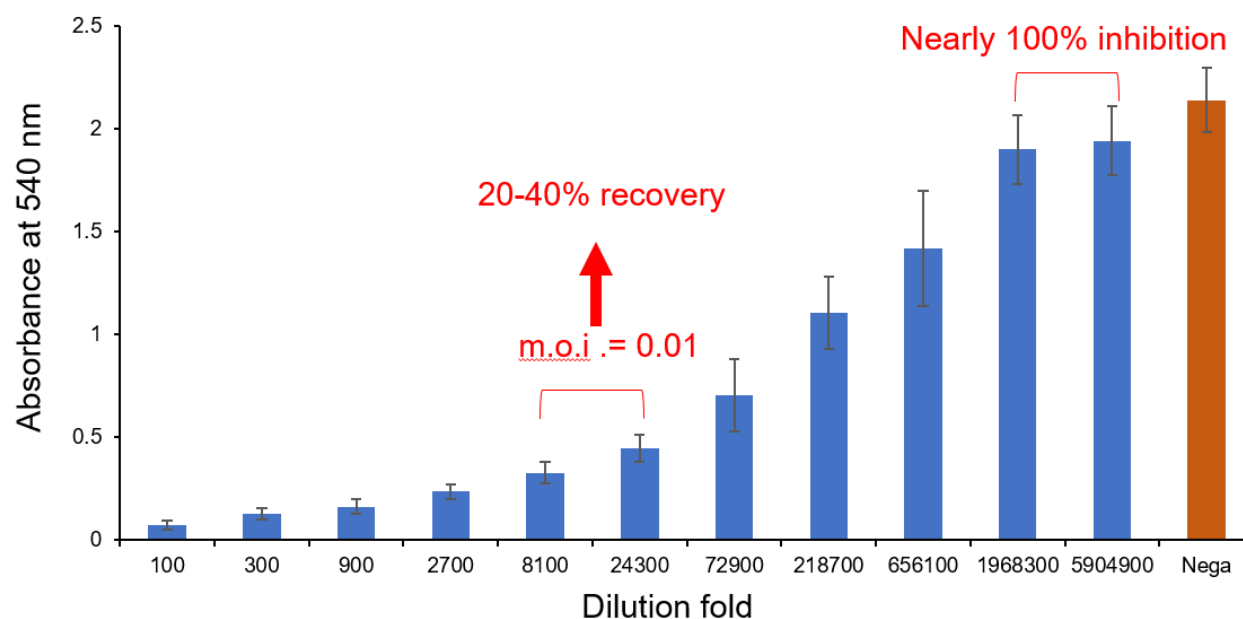

**Figure S1.** Determination of optimal dilution fold to achieve quantifiable anti-HSV activity. Vero cells ( $1 \times 10^4$  cells) were inoculated with HSV diluted at  $100 \times 3^n$ -fold and the viable cell number was determined by MTT method. Each value represents mean  $\pm$  S.D. of 8 determinants.

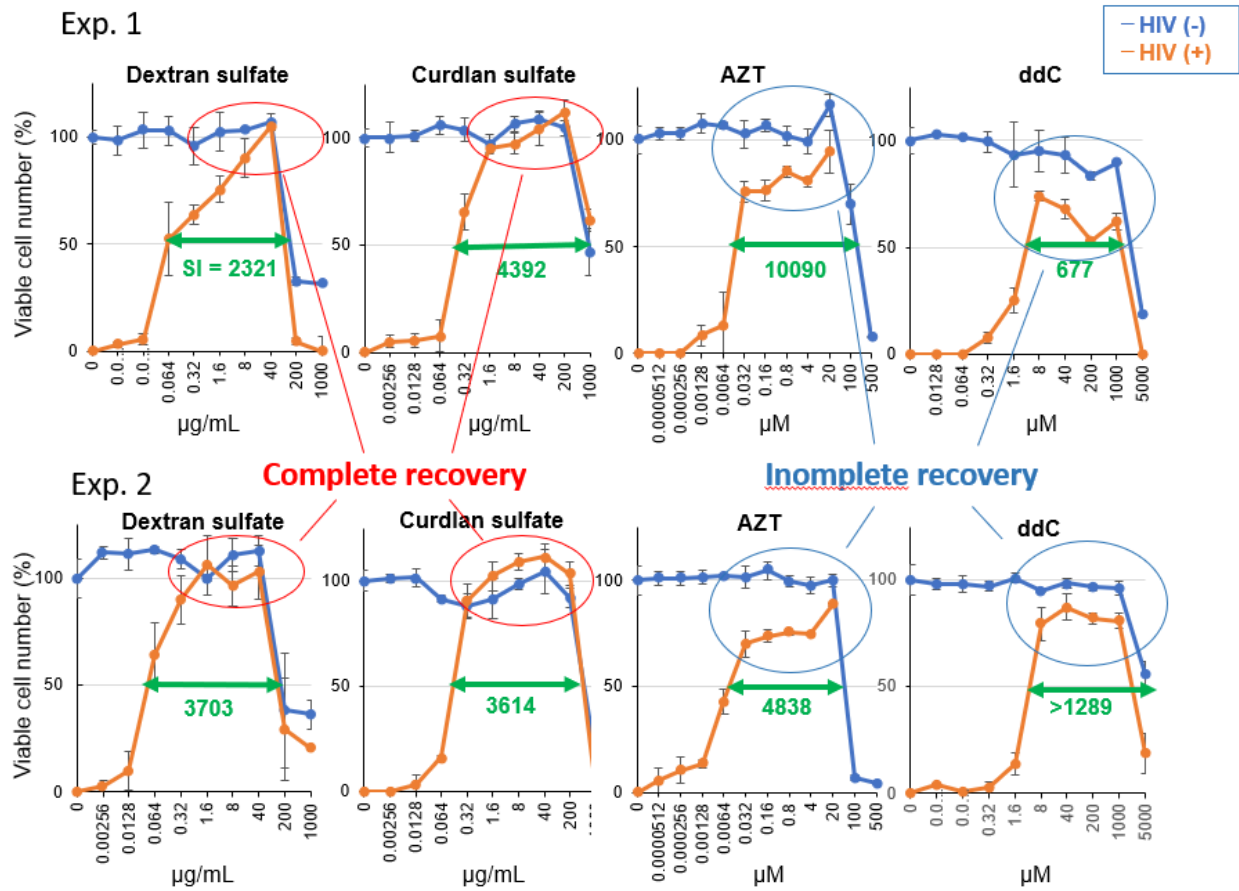

**Figure S2.** Sulfated glucan achieved higher recovery than reverse transcriptase inhibitors.

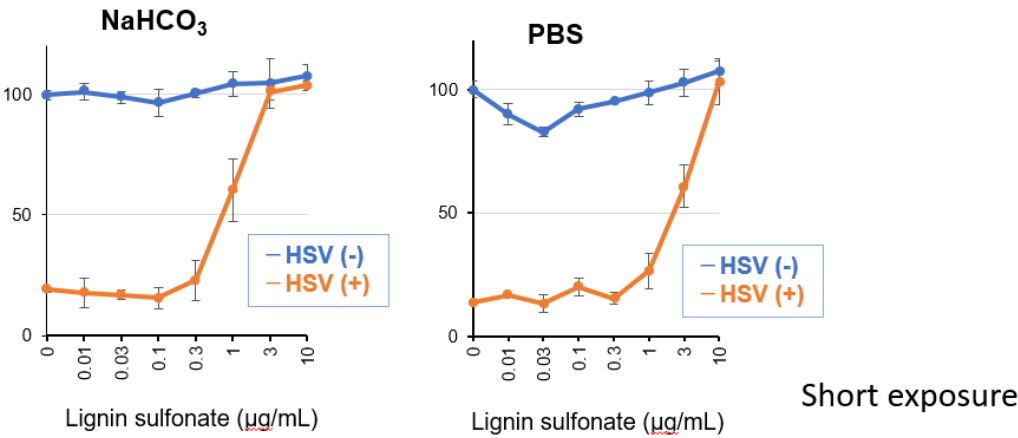

|                  | Solvent            | Viability of HSV-infected cells (%) | CC <sub>50</sub> (mg/mL) | EC <sub>50</sub> -I (mg/mL) | EC <sub>50</sub> -II (mg/mL) | SI -I | SI -II | Max recovery (%) |
|------------------|--------------------|-------------------------------------|--------------------------|-----------------------------|------------------------------|-------|--------|------------------|
| Lignin sulfonate | NaHCO <sub>3</sub> | 19.1                                | >10                      | 1                           | 0.74                         | >10   | >13.5  | 103              |
| Lignin sulfonate | PBS                | 13.6                                | >10                      | 2.7                         | 2.2                          | >3.7  | >4.5   | 102              |

**Figure S3.** Commercial lignosulfonate showed slightly lower anti-HSV activity (SI ≥ 3.7, >4.5) when dissolved in PBS (as shown in supplementary Figure S1), as compared with lignosulfonate B (SI = 14.1, >21.7) and lignosulfonate E (SI ≥ 16.1, >21.7) (Table 2).

**Table S1.** Variability of anti-HIV activity (SI value) of four positive controls reported in our 26 papers.

| Anti-HIV Activity (SI) |                 |              |             |                                |                                         |
|------------------------|-----------------|--------------|-------------|--------------------------------|-----------------------------------------|
| Dextran Sulfate        | Curdlan Sulfate | AZT          | ddC         | Samples Tested                 | Cited From:                             |
| 25323                  | 964             | 2550         | 778         | Lignosulfonate                 | This study (Table 2)                    |
| 2321                   | 4392            | 10090        | 677         | Lignosulfonate                 | This study (Table 2)                    |
| 3703                   | 3614            | 4838         | 1289        | Lignosulfonate                 | This study (Table 2)                    |
| 4200                   | 5294            | 5082         | 1340        | Pyoktanin Blue                 | Medicines (Basel). 2021 Jun 22;8(7):33. |
| 2956                   | 11718           | 23261        | 2974        | Review                         | Medicines (Basel). 2018 Dec 25;6(1):4.  |
| 29485                  |                 | 5082         | 1913        | SE                             | Medicines (Basel). 2020 Oct 6;7(10):64. |
|                        | 7142            | 5624         | 3868        | Mastic extracts                | In Vivo 2017, 31, 591-598               |
| 300                    | 5805            | 2017         | 1670        | Chalcones                      | Anticancer Res 2017, 37, 1091-1098      |
| 47619                  | 10204           | 22893        | 11898       | SE                             | In Vivo 2016;30(4), 421-426             |
| 1935                   | 6028            | 10403        | 1916        | Oleoylamides                   | Anticancer Res 2015, 35, 5299-5307      |
| 17125                  | 7002            | 20421        | 2445        | 3-Styrylchromones              | Anticancer Res 2014, 34, 5405-5411      |
| 12363                  | 5523            | 15882        | 1789        | piperic acid amides            | Anticancer Res 2014, 34, 4877-4884      |
| 10668                  | 8235            | 19778        | 3431        | Licorice Root                  | In Vivo 2014, 28, 785-794               |
| 211                    | 3471            | 20132        | 2813        | SE                             | In Vivo 2013, 27, 275-284               |
|                        |                 | 17850        |             | Kampo Medicines                | In Vivo 2012, 26, 1007-1014             |
| 160                    | 781             | 6931         | 905         | SE-10                          | In Vivo 2012, 26, 411-418               |
| 1378                   | 5606            | 17746        | 5123        | OTC                            | In Vivo 2012, 26, 259-264               |
| 137919                 | 133305          |              |             | Luteolin Glycosides and Tricin | In Vivo 2011, 25, 757-762               |
| 1196                   | 3292            | 10120        | 1536        | cacao massLCC, LPS             | In Vivo 2011, 25, 229-236               |
| 13681                  | 1765            | 6598         | 2516        | LEM                            | In Vivo 2010, 24, 543-552               |
| 329                    | 5111            | 17109        | 934         | Chinese herbal extracts        | Anticancer Res 2009, 29, 3211-3220      |
|                        |                 | 11567        | 1320        | Mastic extracts                | In Vivo 2009, 23, 215-224               |
| 56                     | 3392            | 8726         | 1433        | 3-Formylchromones              | In Vivo 2007, 21, 829-834               |
| 327                    | 7179            | 3346         | 603         | mulberry juice                 | In Vivo 2007, 21(3), 499-505            |
|                        |                 | 6367         | 808         | Trihaloacetylazulenes          | Anticancer Res 2006, 26, 1917-1924      |
| 207                    | 1487            | 2840         | 1237        | Anastasia Black                | Anticancer Res 2006, 25, 1991-2000      |
| <Mean value>           |                 |              |             |                                |                                         |
| 13643                  | 10969           | 11090        | 2300        |                                |                                         |
| (56~137917)            | (781~133305)    | (2840~22893) | (603~11898) |                                |                                         |
